# Supplementary material for: Altered composition and phenotype of mucosal-associated invariant T cells in early untreated rheumatoid arthritis
Source: PubMed Central journal article supplement (PMC6321723; doi:10.1186/s13075-018-1799-1), 2019-01-05

**A**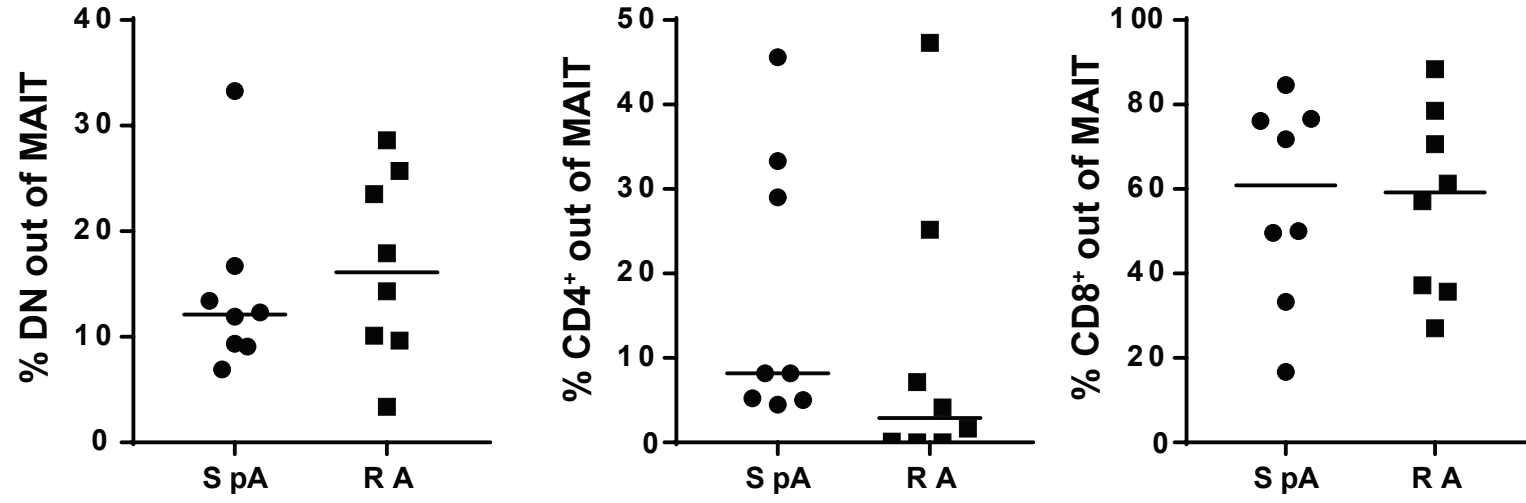**B**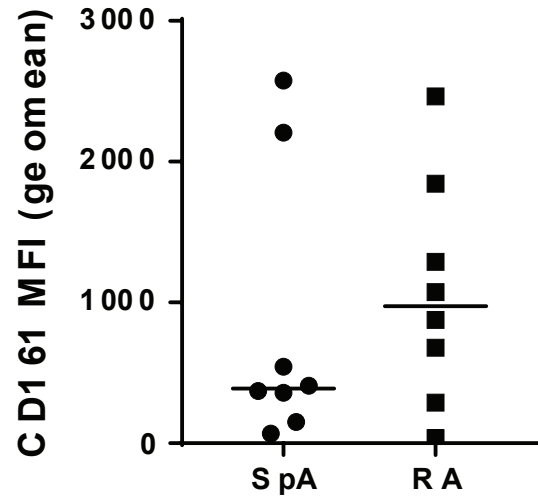

Supplement: 13075_2018_1799_MOESM3_ESM.pdf [file 13075_2018_1799_MOESM3_ESM.pdf]
